# Supplementary material for: NO reduction by CO over CuO–CeO2 catalysts: effect of preparation methods
Source: Royal Society of Chemistry journal article supplement (doi:10.1039/c3cy20805b), 2013-01-01
Supplement: c3cy20805b.pdf [file c3cy20805b.pdf]

## Electronic Supplementary Information (ESI†) for

### **NO reduction by CO over CuO–CeO<sub>2</sub> catalysts: effect of preparation methods**

Xiaojiang Yao <sup>a, b</sup>, Fei Gao <sup>b</sup>, Qiang Yu <sup>c</sup>, Lei Qi <sup>a, b</sup>, Changjin Tang <sup>a, b, \*</sup>, Lin Dong <sup>a, b, \*</sup>  
and Yi Chen <sup>a, b</sup>

<sup>a</sup> *Key Laboratory of Mesoscopic Chemistry of MOE, School of Chemistry and Chemical Engineering, Nanjing University, Nanjing 210093, PR China*

*E-mail addresses: [tangcj@nju.edu.cn](mailto:tangcj@nju.edu.cn) (C.J. Tang); [donglin@nju.edu.cn](mailto:donglin@nju.edu.cn) (L. Dong).*

*Tel.: +86 25 83592290; fax: +86 25 83317761.*

<sup>b</sup> *Jiangsu Key Laboratory of Vehicle Emissions Control, Center of Modern Analysis, Nanjing University, Nanjing 210093, PR China*

<sup>c</sup> *Shanghai Research Institute of Petrochemical Technology, SINOPEC, Shanghai 201208, PR China*

**Scheme S1.** The detailed preparation procedures of these CuO–CeO<sub>2</sub> catalysts.

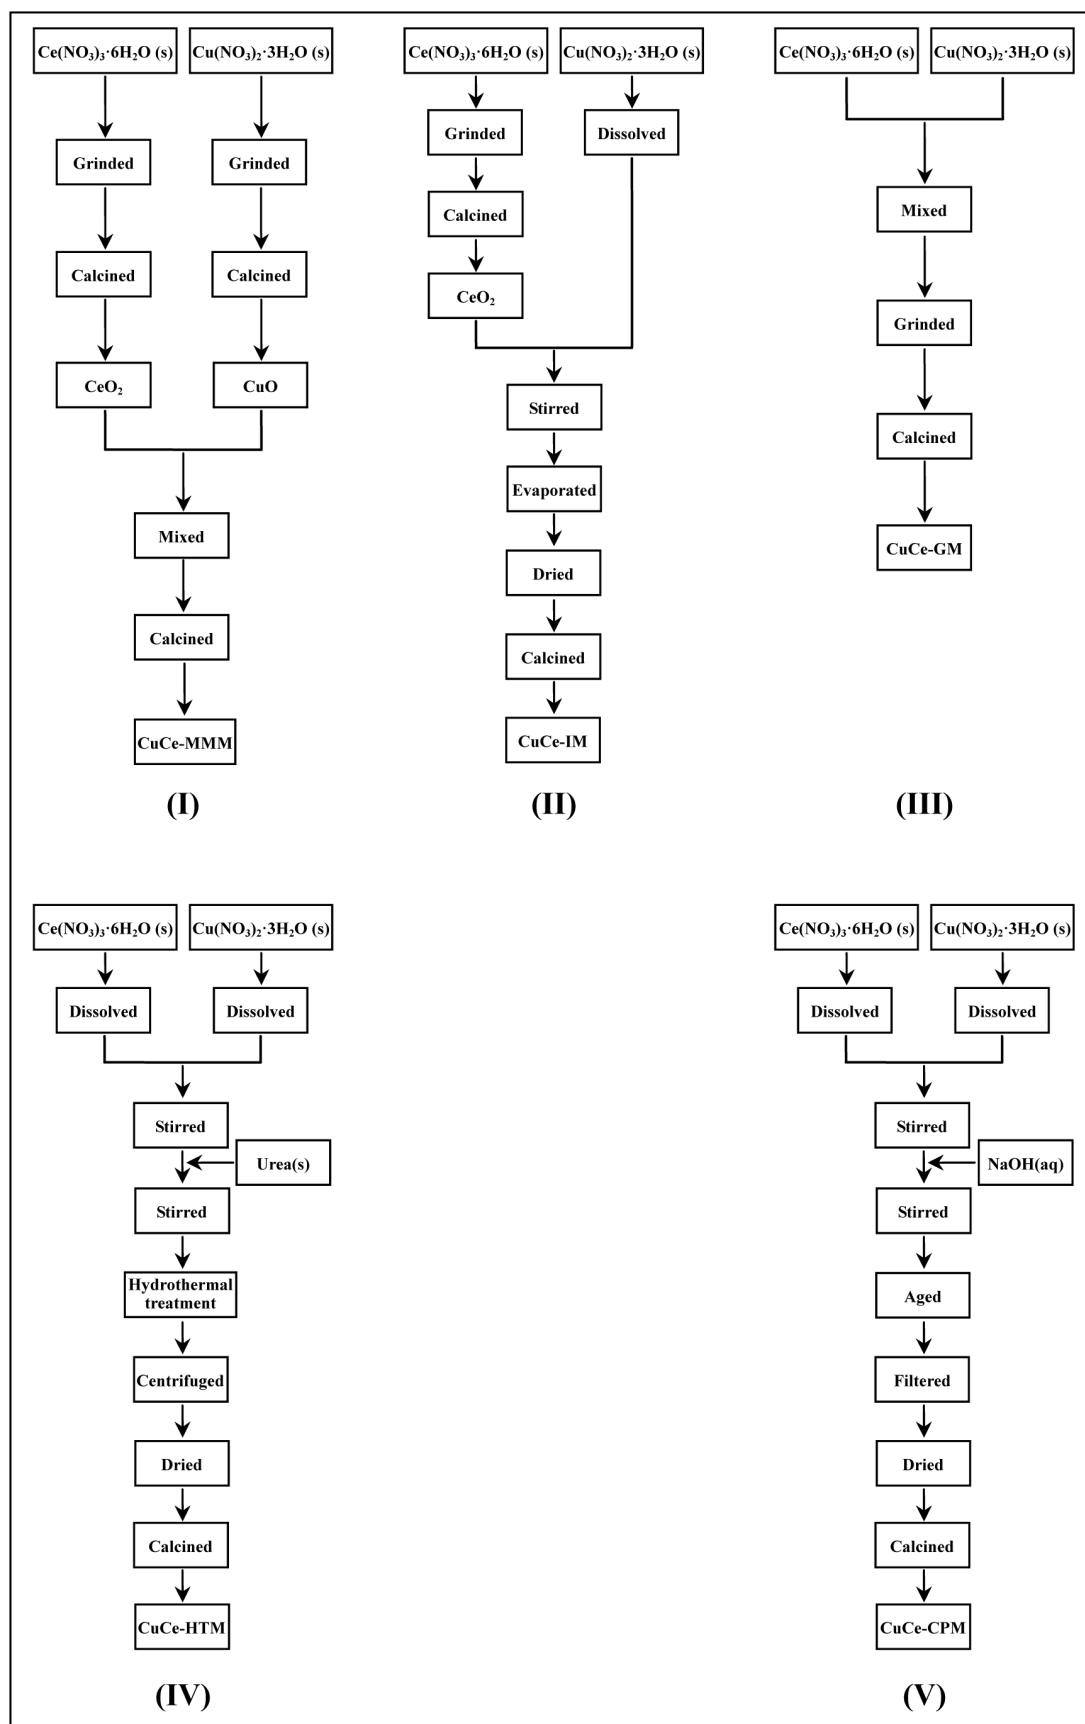

**Table S1** The light-off temperatures of these catalysts.

| Catalysts        | T <sub>10</sub> (°C) <sup>a</sup> | T <sub>50</sub> (°C) <sup>a</sup> | T <sub>90</sub> (°C) <sup>a</sup> |
|------------------|-----------------------------------|-----------------------------------|-----------------------------------|
| CeO <sub>2</sub> | 308                               | --                                | --                                |
| CuCe-MMM         | 170                               | 276                               | 349                               |
| CuCe-IM          | -- <sup>b</sup>                   | 131                               | 283                               |
| CuCe-GM          | 102                               | 156                               | 330                               |
| CuCe-HTM         | 104                               | 164                               | 339                               |
| CuCe-CPM         | --                                | 135                               | 312                               |

<sup>a</sup> T<sub>10</sub>, T<sub>50</sub> and T<sub>90</sub> are defined as the temperatures at 10%, 50% and 90% of NO conversion.

<sup>b</sup> Not observed under the current conditions.
